# Supplementary material for: Cyclin-dependent kinase-specific activity predicts the prognosis of stage I and stage II non-small cell lung cancer
Source: PubMed Central journal article supplement (PMC4198674; doi:10.1186/1471-2407-14-755), 2014-10-09

**A. Adenocarcinoma (n = 118)**

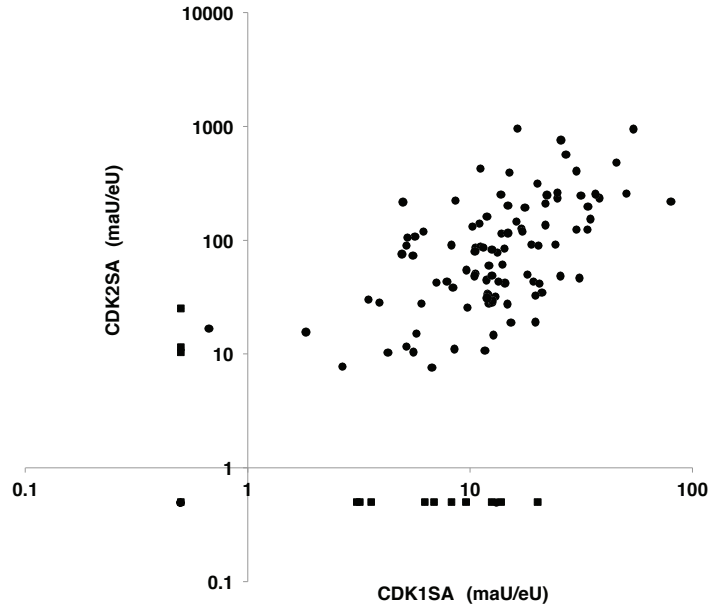

**B. SCC (n = 53)**

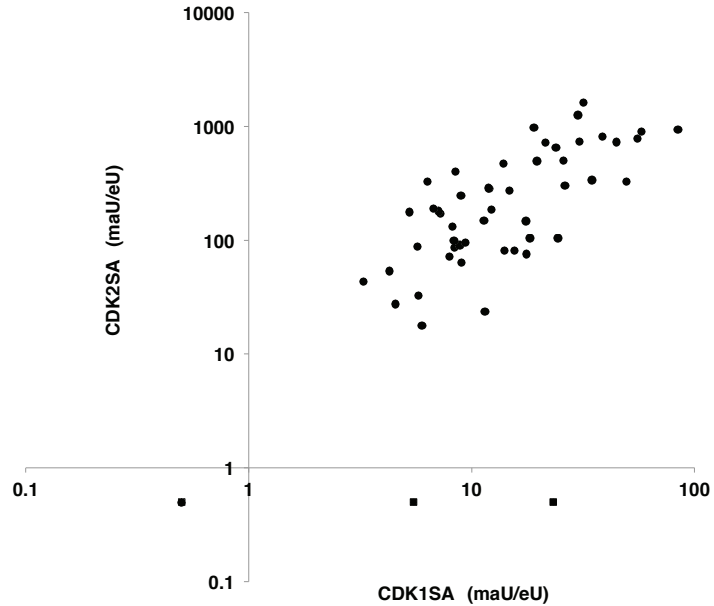

Supplement: 12885_2014_4934_MOESM1_ESM.pdf [file 12885_2014_4934_MOESM1_ESM.pdf]
